# Supplementary material
Source: MDPI journal article supplement (https://www.mdpi.com/2075-163X/13/3/451)
Supplement: s1 [file s1]

Table S1 EPMA data of clinopyroxene from the IOA deposit and biotite from the Shaxi Cu-Au deposit.

| Nihe clinopyroxene |                  |                  |                                |                                |       |      |       |       |                   |                  | P    | T    | H   |
|--------------------|------------------|------------------|--------------------------------|--------------------------------|-------|------|-------|-------|-------------------|------------------|------|------|-----|
| Spot               | SiO <sub>2</sub> | TiO <sub>2</sub> | Al <sub>2</sub> O <sub>3</sub> | Cr <sub>2</sub> O <sub>3</sub> | FeO   | MnO  | MgO   | CaO   | Na <sub>2</sub> O | K <sub>2</sub> O | /MPa | /°C  | /km |
| 1                  | 51.88            | 0.00             | 1.32                           | 0.00                           | 7.60  | 0.33 | 13.34 | 24.25 | 0.58              | 0.00             | 39.3 | 1121 | 1.2 |
| 2                  | 49.77            | 0.06             | 2.64                           | 0.00                           | 13.05 | 0.36 | 9.94  | 23.57 | 0.47              | 0.00             | 43.5 | 1070 | 1.3 |
| 3                  | 48.93            | 0.37             | 2.25                           | 0.02                           | 14.89 | 0.47 | 8.51  | 23.41 | 0.62              | 0.00             | 32.7 | 1043 | 1.0 |
| 4                  | 50.47            | 0.21             | 1.36                           | 0.03                           | 13.76 | 0.75 | 9.06  | 23.16 | 0.59              | 0.00             | 96.0 | 1038 | 2.9 |
| 5                  | 50.37            | 0.21             | 2.30                           | 0.01                           | 10.46 | 0.34 | 11.31 | 24.03 | 0.63              | 0.00             | 88.9 | 1095 | 2.7 |

  

| Shaxi Biotite |                  |                  |                                |                                |       |      |       |      |                   |                  | P     | T/  | H   | Fe     |
|---------------|------------------|------------------|--------------------------------|--------------------------------|-------|------|-------|------|-------------------|------------------|-------|-----|-----|--------|
| Spot          | SiO <sub>2</sub> | TiO <sub>2</sub> | Al <sub>2</sub> O <sub>3</sub> | Cr <sub>2</sub> O <sub>3</sub> | FeO   | MnO  | MgO   | CaO  | Na <sub>2</sub> O | K <sub>2</sub> O | /MPa  | °C  | /km | /Fe+Mg |
| 1             | 37.19            | 4.25             | 13.32                          | 0.03                           | 15.32 | 0.13 | 15.86 | 0.00 | 0.34              | 8.89             | 68.6  | 717 | 2.1 | 0.34   |
| 2             | 37.26            | 4.07             | 13.38                          | 0.01                           | 15.34 | 0.11 | 15.90 | 0.00 | 0.22              | 8.79             | 72.3  | 706 | 2.2 | 0.34   |
| 3             | 37.28            | 4.02             | 13.73                          | 0.00                           | 15.37 | 0.15 | 15.57 | 0.00 | 0.30              | 9.06             | 88.8  | 701 | 2.7 | 0.34   |
| 4             | 37.36            | 4.29             | 13.33                          | 0.05                           | 15.32 | 0.17 | 15.79 | 0.00 | 0.23              | 9.20             | 66.5  | 709 | 2.0 | 0.34   |
| 5             | 37.84            | 4.25             | 13.08                          | 0.03                           | 14.92 | 0.11 | 15.80 | 0.00 | 0.21              | 9.30             | 51.9  | 711 | 1.6 | 0.35   |
| 6             | 37.19            | 4.36             | 13.33                          | 0.03                           | 15.45 | 0.13 | 15.73 | 0.00 | 0.29              | 9.02             | 68.7  | 706 | 2.1 | 0.35   |
| 7             | 37.16            | 4.33             | 13.21                          | 0.01                           | 15.38 | 0.18 | 15.79 | 0.00 | 0.21              | 9.04             | 63.6  | 706 | 1.9 | 0.35   |
| 8             | 37.28            | 4.28             | 13.50                          | 0.00                           | 15.17 | 0.11 | 15.85 | 0.00 | 0.31              | 9.12             | 75.7  | 707 | 2.3 | 0.35   |
| 9             | 36.93            | 4.32             | 13.98                          | 0.00                           | 15.31 | 0.09 | 15.42 | 0.00 | 0.28              | 9.24             | 103.1 | 711 | 3.1 | 0.35   |
| 10            | 37.37            | 4.08             | 14.15                          | 0.02                           | 14.70 | 0.15 | 15.64 | 0.05 | 0.31              | 8.95             | 107.8 | 734 | 3.3 | 0.35   |
| 11            | 37.19            | 4.17             | 14.02                          | 0.04                           | 14.83 | 0.13 | 15.79 | 0.05 | 0.33              | 8.99             | 102.1 | 716 | 3.1 | 0.35   |
| 12            | 37.09            | 4.40             | 13.93                          | 0.06                           | 14.97 | 0.12 | 15.36 | 0.05 | 0.30              | 8.82             | 101.0 | 704 | 3.1 | 0.35   |
| 13            | 37.13            | 4.13             | 13.92                          | 0.00                           | 14.89 | 0.13 | 15.67 | 0.00 | 0.31              | 8.92             | 100.0 | 694 | 3.0 | 0.35   |
| 14            | 37.45            | 4.07             | 13.78                          | 0.00                           | 14.81 | 0.11 | 15.98 | 0.01 | 0.37              | 8.93             | 87.9  | 692 | 2.7 | 0.35   |
| 15            | 37.42            | 4.11             | 13.86                          | 0.05                           | 15.18 | 0.09 | 15.84 | 0.02 | 0.24              | 9.14             | 91.0  | 704 | 2.8 | 0.35   |
| 16            | 37.38            | 4.17             | 14.05                          | 0.06                           | 14.32 | 0.13 | 15.78 | 0.05 | 0.28              | 8.92             | 103.6 | 656 | 3.1 | 0.35   |
| 17            | 37.02            | 4.28             | 13.62                          | 0.01                           | 15.23 | 0.29 | 15.43 | 0.01 | 0.28              | 8.89             | 86.9  | 657 | 2.6 | 0.35   |
| 18            | 37.22            | 4.11             | 13.62                          | 0.00                           | 15.30 | 0.25 | 15.52 | 0.00 | 0.25              | 8.95             | 85.0  | 660 | 2.6 | 0.36   |
| 19            | 37.20            | 4.05             | 13.44                          | 0.01                           | 15.04 | 0.27 | 15.80 | 0.01 | 0.29              | 9.02             | 76.1  | 650 | 2.3 | 0.36   |
| 20            | 37.51            | 4.33             | 13.85                          | 0.00                           | 15.29 | 0.25 | 15.31 | 0.00 | 0.29              | 9.00             | 91.2  | 663 | 2.8 | 0.36   |
| 21            | 37.17            | 4.37             | 13.79                          | 0.02                           | 14.50 | 0.31 | 15.52 | 0.00 | 0.36              | 9.10             | 93.3  | 665 | 2.8 | 0.36   |
| 22            | 37.30            | 4.03             | 13.87                          | 0.04                           | 14.89 | 0.22 | 15.45 | 0.00 | 0.28              | 9.13             | 97.0  | 638 | 2.9 | 0.36   |
| 23            | 36.77            | 5.76             | 14.16                          | 0.00                           | 15.17 | 0.07 | 14.70 | 0.01 | 0.60              | 8.69             | 108.5 | 647 | 3.3 | 0.36   |
| 24            | 36.48            | 5.99             | 14.37                          | 0.01                           | 15.30 | 0.13 | 14.22 | 0.00 | 0.60              | 8.88             | 121.7 | 651 | 3.7 | 0.37   |
| 25            | 36.50            | 5.62             | 14.54                          | 0.00                           | 14.23 | 0.13 | 15.18 | 0.08 | 0.58              | 8.69             | 129.4 | 651 | 3.9 | 0.38   |

**Table S2:** The zircon LA-ICP-MS U-Pb dating from the Nihe IOA deposit and the Shaxi Cu-Au deposit..

| Spot                            | U     | Th    | Th<br>/U | $^{207}\text{Pb}$<br>/ $^{206}\text{Pb}$ | $1\sigma$ | $^{207}\text{Pb}$<br>/ $^{235}\text{U}$ | $1\sigma$ | $^{206}\text{Pb}$<br>/ $^{238}\text{U}$ | $1\sigma$ | $^{206}\text{Pb}/^{238}\text{U}(\text{Ma})$ | $1\sigma$ | Concordance |
|---------------------------------|-------|-------|----------|------------------------------------------|-----------|-----------------------------------------|-----------|-----------------------------------------|-----------|---------------------------------------------|-----------|-------------|
| <b>Nihe magma zircon</b>        |       |       |          |                                          |           |                                         |           |                                         |           |                                             |           |             |
| 1                               | 3426  | 5419  | 1.58     | 0.04947                                  | 0.00145   | 0.13857                                 | 0.00396   | 0.02031                                 | 0.00019   | 129.60                                      | 1.23      | 0.98        |
| 2                               | 6020  | 9494  | 1.58     | 0.05062                                  | 0.00110   | 0.14477                                 | 0.00331   | 0.02070                                 | 0.00022   | 132.10                                      | 1.38      | 0.96        |
| 3                               | 2910  | 4569  | 1.57     | 0.05075                                  | 0.00151   | 0.14383                                 | 0.00454   | 0.02046                                 | 0.00019   | 130.59                                      | 1.21      | 0.95        |
| 4                               | 4111  | 5410  | 1.32     | 0.04903                                  | 0.00125   | 0.13901                                 | 0.00354   | 0.02064                                 | 0.00021   | 131.68                                      | 1.31      | 0.99        |
| 5                               | 2985  | 2731  | 0.91     | 0.04654                                  | 0.00157   | 0.12977                                 | 0.00443   | 0.02026                                 | 0.00020   | 129.30                                      | 1.29      | 0.95        |
| 6                               | 3915  | 4727  | 1.21     | 0.04921                                  | 0.00128   | 0.13982                                 | 0.00362   | 0.02064                                 | 0.00017   | 131.73                                      | 1.08      | 0.99        |
| 7                               | 7644  | 12874 | 1.68     | 0.05002                                  | 0.00116   | 0.13962                                 | 0.00361   | 0.02017                                 | 0.00018   | 128.75                                      | 1.13      | 0.96        |
| 8                               | 4426  | 7023  | 1.59     | 0.04843                                  | 0.00123   | 0.13758                                 | 0.00355   | 0.02065                                 | 0.00020   | 131.74                                      | 1.24      | 0.99        |
| 9                               | 8476  | 14608 | 1.72     | 0.04913                                  | 0.00114   | 0.13880                                 | 0.00332   | 0.02049                                 | 0.00022   | 130.78                                      | 1.40      | 0.99        |
| 10                              | 2301  | 8014  | 3.48     | 0.04820                                  | 0.00157   | 0.13492                                 | 0.00445   | 0.02030                                 | 0.00020   | 129.58                                      | 1.27      | 0.99        |
| 11                              | 5548  | 9979  | 1.80     | 0.05018                                  | 0.00125   | 0.14175                                 | 0.00371   | 0.02043                                 | 0.00020   | 130.35                                      | 1.24      | 0.96        |
| 12                              | 3363  | 3960  | 1.18     | 0.05102                                  | 0.00142   | 0.14372                                 | 0.00402   | 0.02044                                 | 0.00021   | 130.45                                      | 1.32      | 0.95        |
| <b>Nihe hydrothermal zircon</b> |       |       |          |                                          |           |                                         |           |                                         |           |                                             |           |             |
| 1                               | 8644  | 14867 | 1.72     | 0.05054                                  | 0.00105   | 0.14275                                 | 0.00314   | 0.02042                                 | 0.00021   | 130.31                                      | 1.32      | 0.96        |
| 2                               | 33015 | 67911 | 2.06     | 0.04916                                  | 0.00091   | 0.13883                                 | 0.00280   | 0.02040                                 | 0.00022   | 130.21                                      | 1.42      | 0.98        |
| 3                               | 15316 | 30924 | 2.02     | 0.04834                                  | 0.00099   | 0.13691                                 | 0.00303   | 0.02045                                 | 0.00021   | 130.48                                      | 1.34      | 0.99        |
| 4                               | 4335  | 3587  | 0.83     | 0.05025                                  | 0.00121   | 0.14241                                 | 0.00362   | 0.02045                                 | 0.00020   | 130.48                                      | 1.29      | 0.96        |
| 5                               | 6079  | 9327  | 1.53     | 0.04854                                  | 0.00123   | 0.13761                                 | 0.00358   | 0.02051                                 | 0.00025   | 130.86                                      | 1.56      | 0.99        |
| 6                               | 6259  | 12969 | 2.07     | 0.05011                                  | 0.00120   | 0.14208                                 | 0.00349   | 0.02051                                 | 0.00022   | 130.88                                      | 1.42      | 0.96        |
| 7                               | 12721 | 33829 | 2.66     | 0.04988                                  | 0.00101   | 0.14139                                 | 0.00314   | 0.02046                                 | 0.00022   | 130.54                                      | 1.38      | 0.97        |
| 8                               | 4476  | 8008  | 1.79     | 0.05123                                  | 0.00151   | 0.14460                                 | 0.00418   | 0.02046                                 | 0.00021   | 130.54                                      | 1.31      | 0.95        |
| 9                               | 8208  | 17335 | 2.11     | 0.04920                                  | 0.00134   | 0.13911                                 | 0.00385   | 0.02044                                 | 0.00024   | 130.45                                      | 1.50      | 0.98        |
| 10                              | 6275  | 12386 | 1.97     | 0.04801                                  | 0.00119   | 0.13632                                 | 0.00346   | 0.02052                                 | 0.00021   | 130.91                                      | 1.30      | 0.99        |
| 11                              | 14192 | 17534 | 1.24     | 0.05103                                  | 0.00147   | 0.14291                                 | 0.00287   | 0.02053                                 | 0.00026   | 131.00                                      | 1.63      | 0.96        |
| 12                              | 13903 | 32773 | 2.36     | 0.04885                                  | 0.00097   | 0.13868                                 | 0.00291   | 0.02049                                 | 0.00022   | 130.73                                      | 1.37      | 0.99        |
| 13                              | 6275  | 12581 | 2.01     | 0.04913                                  | 0.00125   | 0.13917                                 | 0.00381   | 0.02041                                 | 0.00022   | 130.25                                      | 1.38      | 0.98        |
| 14                              | 9357  | 31091 | 3.32     | 0.04783                                  | 0.00109   | 0.13632                                 | 0.00319   | 0.02056                                 | 0.00022   | 131.18                                      | 1.40      | 0.98        |
| <b>Shaxi magma zircon</b>       |       |       |          |                                          |           |                                         |           |                                         |           |                                             |           |             |
| 1                               | 969   | 322   | 0.33     | 0.05250                                  | 0.00265   | 0.14830                                 | 0.00736   | 0.02028                                 | 0.00028   | 129.43                                      | 1.76      | 0.91        |
| 2                               | 967   | 538   | 0.56     | 0.04937                                  | 0.00256   | 0.13885                                 | 0.00689   | 0.02038                                 | 0.00027   | 130.07                                      | 1.69      | 0.98        |
| 3                               | 945   | 607   | 0.64     | 0.05211                                  | 0.00259   | 0.14796                                 | 0.00719   | 0.02051                                 | 0.00025   | 130.89                                      | 1.61      | 0.93        |
| 4                               | 791   | 429   | 0.54     | 0.04945                                  | 0.00305   | 0.13792                                 | 0.00779   | 0.02050                                 | 0.00033   | 130.81                                      | 2.11      | 0.99        |
| 5                               | 1174  | 747   | 0.64     | 0.05041                                  | 0.00244   | 0.14105                                 | 0.00691   | 0.02035                                 | 0.00027   | 129.87                                      | 1.71      | 0.96        |
| 6                               | 1573  | 1109  | 0.70     | 0.04615                                  | 0.00244   | 0.12927                                 | 0.00705   | 0.02030                                 | 0.00025   | 129.52                                      | 1.56      | 0.95        |

|    |      |     |      |         |         |         |         |         |         |        |      |      |
|----|------|-----|------|---------|---------|---------|---------|---------|---------|--------|------|------|
| 7  | 586  | 245 | 0.42 | 0.05026 | 0.00272 | 0.14043 | 0.00693 | 0.02038 | 0.00032 | 130.04 | 2.00 | 0.97 |
| 8  | 841  | 620 | 0.74 | 0.04493 | 0.00245 | 0.12898 | 0.00644 | 0.02043 | 0.00027 | 130.38 | 1.70 | 0.94 |
| 9  | 892  | 422 | 0.47 | 0.04585 | 0.00335 | 0.12917 | 0.00884 | 0.02022 | 0.00035 | 129.02 | 2.21 | 0.95 |
| 10 | 971  | 421 | 0.43 | 0.04908 | 0.00229 | 0.13615 | 0.00562 | 0.02037 | 0.00025 | 130.02 | 1.55 | 0.99 |
| 11 | 612  | 278 | 0.45 | 0.04821 | 0.00301 | 0.14028 | 0.00779 | 0.02028 | 0.00027 | 129.44 | 1.73 | 0.97 |
| 12 | 674  | 191 | 0.28 | 0.04614 | 0.00283 | 0.13374 | 0.00702 | 0.02034 | 0.00028 | 129.79 | 1.74 | 0.98 |
| 13 | 903  | 375 | 0.42 | 0.04946 | 0.00263 | 0.14101 | 0.00670 | 0.02049 | 0.00029 | 130.72 | 1.85 | 0.97 |
| 14 | 1440 | 626 | 0.44 | 0.05034 | 0.00207 | 0.14517 | 0.00609 | 0.02082 | 0.00029 | 132.83 | 1.82 | 0.96 |
| 15 | 670  | 273 | 0.41 | 0.04669 | 0.00247 | 0.13390 | 0.00691 | 0.02057 | 0.00033 | 131.27 | 2.06 | 0.97 |
| 16 | 1055 | 535 | 0.51 | 0.04959 | 0.00236 | 0.13889 | 0.00613 | 0.02029 | 0.00031 | 129.51 | 1.93 | 0.98 |
| 17 | 881  | 504 | 0.57 | 0.04876 | 0.00226 | 0.13991 | 0.00618 | 0.02043 | 0.00028 | 130.36 | 1.78 | 0.98 |
| 18 | 515  | 106 | 0.21 | 0.04342 | 0.00271 | 0.13235 | 0.00693 | 0.02009 | 0.00035 | 128.26 | 2.21 | 0.98 |
| 19 | 863  | 390 | 0.45 | 0.04899 | 0.00236 | 0.13784 | 0.00665 | 0.02037 | 0.00028 | 130.00 | 1.76 | 0.99 |
| 20 | 818  | 535 | 0.65 | 0.05134 | 0.00291 | 0.14066 | 0.00738 | 0.01981 | 0.00025 | 126.48 | 1.60 | 0.94 |

**Shaxi inherited zircon**

|   |      |      |      |         |         |         |         |         |         |        |      |      |
|---|------|------|------|---------|---------|---------|---------|---------|---------|--------|------|------|
| 1 | 320  | 157  | 0.49 | 0.06809 | 0.00207 | 1.25134 | 0.03758 | 0.13355 | 0.00132 | 808.08 | 7.52 | 0.98 |
| 2 | 467  | 415  | 0.89 | 0.06532 | 0.00187 | 1.17362 | 0.03304 | 0.13046 | 0.00111 | 790.47 | 6.36 | 0.99 |
| 3 | 2138 | 4316 | 2.02 | 0.06458 | 0.00138 | 1.20001 | 0.02747 | 0.13372 | 0.00175 | 809.06 | 9.95 | 0.98 |

Table S3: In situ trace element data of zircon from the Nihe IOA deposit and the Shaxi Cu-Au deposit.

3

| Spot                            | Ti   | T    | Log $f_{O_2}$ | $\Delta FMQ$ | La   | Ce     | Pr   | Nd    | Sm    | Eu   | Gd    | Tb   | Dy    | Ho    | Er    | Tm    | Yb     | Lu    | Hf      | Y      | U      | Th      |
|---------------------------------|------|------|---------------|--------------|------|--------|------|-------|-------|------|-------|------|-------|-------|-------|-------|--------|-------|---------|--------|--------|---------|
| <b>Nihe magmatic zircon</b>     |      |      |               |              |      |        |      |       |       |      |       |      |       |       |       |       |        |       |         |        |        |         |
| 1                               | 2.7  | 677  | -17.35        | 0.39         | 0.02 | 20.65  | 0.03 | 0.41  | 1.23  | 0.45 | 6.30  | 1.86 | 22.42 | 9.40  | 47.03 | 11.76 | 127.53 | 29.13 | 5990.5  | 344.2  | 1331.6 | 1875.5  |
| 2                               | 2.7  | 676  | -17.29        | 0.48         | 0.09 | 20.89  | 0.15 | 1.48  | 1.24  | 0.76 | 7.0   | 2.3  | 25.0  | 9.8   | 50.2  | 12.7  | 140.3  | 31.8  | 6707.2  | 362.7  | 1252.4 | 1763.8  |
| 3                               | 35.2 | 944  | -12.85        | -0.86        | 1.08 | 34.46  | 1.17 | 4.70  | 3.24  | 0.93 | 9.6   | 3.3  | 36.1  | 14.8  | 76.7  | 19.0  | 200.2  | 37.1  | 8606.3  | 497.6  | 1219.5 | 939.3   |
| 4                               | 1.1  | 605  | -18.28        | 1.64         | 0.27 | 26.92  | 0.73 | 6.36  | 5.12  | 1.63 | 18.3  | 5.2  | 56.4  | 22.9  | 115.0 | 27.7  | 295.0  | 65.6  | 5554.4  | 851.8  | 1409.1 | 2258.2  |
| 5                               | 0.0  |      |               |              | 0.02 | 20.41  | 0.13 | 0.98  | 1.59  | 0.49 | 7.9   | 2.8  | 28.7  | 12.1  | 62.0  | 15.3  | 172.1  | 40.1  | 5893.7  | 449.5  | 1163.7 | 1460.7  |
| 6                               | 0.1  | 485  | -21.17        | 3.29         | 0.27 | 26.30  | 0.17 | 2.48  | 2.36  | 0.92 | 12.6  | 3.5  | 38.5  | 16.8  | 85.5  | 20.7  | 232.2  | 50.5  | 5491.7  | 626.1  | 1467.1 | 2255.8  |
| 7                               | 1.4  | 625  | -17.81        | 1.48         | 0.10 | 31.42  | 0.34 | 3.36  | 4.97  | 1.36 | 15.9  | 5.0  | 55.9  | 22.4  | 116.8 | 28.1  | 298.8  | 65.2  | 5432.2  | 840.8  | 1746.8 | 2883.7  |
| 8                               | 1.2  | 613  | -18.59        | 1.08         | 0.04 | 21.22  | 0.23 | 2.56  | 4.02  | 1.21 | 18.3  | 5.3  | 63.0  | 25.8  | 135.5 | 33.1  | 362.7  | 81.7  | 5296.1  | 954.1  | 1498.1 | 1928.8  |
| 9                               | 0.9  | 595  | -18.61        | 1.64         | 0.10 | 25.52  | 0.29 | 2.32  | 3.06  | 0.85 | 9.1   | 2.4  | 29.5  | 11.4  | 56.9  | 14.2  | 149.4  | 33.1  | 5369.0  | 423.8  | 1465.6 | 2215.6  |
| 10                              | 4.7  | 723  | -16.63        | -0.08        | 0.01 | 19.66  | 0.14 | 2.13  | 2.34  | 0.68 | 9.8   | 3.0  | 35.8  | 15.3  | 80.9  | 19.9  | 212.0  | 49.6  | 6730.1  | 564.6  | 1230.2 | 1469.2  |
| 11                              | 1.2  | 613  | -18.54        | 1.11         | 0.02 | 20.84  | 0.10 | 1.18  | 1.34  | 0.63 | 8.8   | 2.5  | 30.9  | 12.2  | 64.0  | 16.2  | 172.2  | 38.6  | 6329.6  | 453.6  | 1381.6 | 1999.3  |
| 12                              | 2.7  | 675  | -17.10        | 0.71         | 0.10 | 25.50  | 0.54 | 4.31  | 5.46  | 1.57 | 18.7  | 5.5  | 60.8  | 23.9  | 120.4 | 29.1  | 312.5  | 70.2  | 5559.5  | 877.7  | 1456.6 | 2221.4  |
| <b>Nihe hydrothermal zircon</b> |      |      |               |              |      |        |      |       |       |      |       |      |       |       |       |       |        |       |         |        |        |         |
| 1                               | 62.4 | 1026 | -10.98        | -0.27        | 0.23 | 155.23 | 1.28 | 14.38 | 18.33 | 1.25 | 69.2  | 20.9 | 202.0 | 68.8  | 297.8 | 63.9  | 599.0  | 113.8 | 12435.8 | 2407.0 | 7133.0 | 18146.0 |
| 2                               | 33.7 | 938  | -10.92        | 1.18         | 0.64 | 236.25 | 5.68 | 73.85 | 79.84 | 3.17 | 240.5 | 64.7 | 600.9 | 187.0 | 751.1 | 153.4 | 1389.0 | 253.0 | 9073.5  | 5938.4 | 5736.6 | 14344.9 |
| 3                               | 41.3 | 966  | -11.80        | -0.16        | 0.31 | 79.51  | 2.04 | 22.52 | 27.92 | 1.38 | 91.9  | 24.7 | 240.3 | 77.9  | 322.9 | 67.3  | 624.1  | 119.2 | 10832.2 | 2593.7 | 2499.6 | 4586.7  |
| 4                               | 33.3 | 937  | -13.28        | -1.16        | 0.06 | 33.72  | 0.48 | 6.13  | 10.08 | 0.73 | 34.5  | 9.9  | 102.9 | 34.6  | 155.8 | 35.1  | 356.7  | 72.7  | 10592.4 | 1155.1 | 1747.9 | 1195.2  |
| 5                               | 45.8 | 981  | -10.41        | 1.00         | 0.35 | 199.74 | 2.50 | 33.72 | 41.12 | 1.54 | 137.1 | 36.8 | 357.5 | 116.0 | 483.3 | 101.7 | 972.2  | 183.5 | 9571.3  | 4067.7 | 3734.7 | 12199.2 |
| 6                               | 38.8 | 958  | -11.98        | -0.20        | 0.06 | 82.13  | 0.76 | 8.71  | 11.31 | 0.57 | 40.3  | 12.2 | 122.6 | 42.3  | 188.8 | 40.5  | 398.5  | 77.5  | 11638.0 | 1494.4 | 2957.3 | 5151.8  |
| 7                               | 38.4 | 956  | -11.97        | -0.17        | 0.18 | 70.09  | 1.04 | 12.24 | 15.86 | 1.03 | 55.2  | 15.3 | 155.6 | 51.2  | 224.3 | 47.0  | 455.4  | 87.4  | 11463.8 | 1823.3 | 2096.9 | 4097.3  |
| 8                               | 37.5 | 953  | -13.07        | -1.21        | 0.05 | 35.19  | 0.55 | 5.04  | 6.78  | 0.58 | 24.9  | 6.9  | 74.8  | 27.7  | 132.0 | 30.3  | 322.1  | 67.7  | 9396.5  | 954.1  | 1803.5 | 1749.4  |
| 9                               | 27.2 | 911  | -12.60        | -0.02        | 0.22 | 68.77  | 1.49 | 17.35 | 23.58 | 1.23 | 79.3  | 22.1 | 213.0 | 70.8  | 300.2 | 62.3  | 589.2  | 112.4 | 10730.7 | 2452.3 | 2410.6 | 4070.2  |
| 10                              | 22.6 | 888  | -11.36        | 1.64         | 1.06 | 246.27 | 7.57 | 88.70 | 93.39 | 3.95 | 255.2 | 67.7 | 614.1 | 196.8 | 808.8 | 163.4 | 1502.8 | 281.7 | 6863.5  | 6078.8 | 5510.3 | 10391.8 |

| Spot                  | Ti  | T   | Log $f_{O_2}$ | $\Delta FMQ$ | La   | Ce    | Pr   | Nd   | Sm   | Eu   | Gd   | Tb   | Dy    | Ho   | Er    | Tm   | Yb    | Lu    | Hf      | Y      | U     | Th    |
|-----------------------|-----|-----|---------------|--------------|------|-------|------|------|------|------|------|------|-------|------|-------|------|-------|-------|---------|--------|-------|-------|
| Shaxi magmatic zircon |     |     |               |              |      |       |      |      |      |      |      |      |       |      |       |      |       |       |         |        |       |       |
| 1                     | 5.9 | 744 | -14.12        | 1.90         | 0.10 | 32.53 | 0.11 | 1.30 | 3.46 | 2.08 | 21.6 | 8.2  | 98.9  | 42.3 | 202.8 | 48.9 | 517.1 | 123.0 | 10091.2 | 1423.4 | 271.9 | 157.3 |
| 2                     | 4.4 | 717 | -15.29        | 1.41         | 0.00 | 15.02 | 0.04 | 0.62 | 1.73 | 0.92 | 8.0  | 2.9  | 33.2  | 14.4 | 71.8  | 17.5 | 200.6 | 49.3  | 9417.5  | 485.4  | 137.7 | 64.0  |
| 3                     | 3.0 | 684 | -15.70        | 1.85         | 0.01 | 21.38 | 0.03 | 0.63 | 1.79 | 0.99 | 11.9 | 3.9  | 46.3  | 20.6 | 98.7  | 24.6 | 270.9 | 65.1  | 11076.1 | 687.6  | 245.1 | 113.3 |
| 4                     | 2.6 | 673 | -15.98        | 1.89         | 0.03 | 18.05 | 0.04 | 0.60 | 1.64 | 0.84 | 9.9  | 3.6  | 43.5  | 18.9 | 93.5  | 23.3 | 252.4 | 62.3  | 10888.0 | 644.6  | 192.1 | 83.9  |
| 5                     | 5.9 | 744 | -14.67        | 1.34         | 0.10 | 25.71 | 0.09 | 1.31 | 2.55 | 1.60 | 17.5 | 6.2  | 76.0  | 33.5 | 165.7 | 40.5 | 440.7 | 106.4 | 10587.0 | 1135.5 | 320.6 | 179.4 |
| 6                     | 3.8 | 704 | -15.19        | 1.83         | 0.07 | 24.56 | 0.10 | 1.49 | 3.42 | 1.47 | 20.0 | 6.9  | 79.4  | 35.2 | 173.1 | 42.1 | 463.8 | 112.8 | 10479.5 | 1185.2 | 260.9 | 143.9 |
| 7                     | 6.6 | 755 | -14.43        | 1.33         | 2.49 | 24.57 | 1.14 | 6.04 | 3.41 | 0.92 | 15.8 | 5.3  | 60.5  | 25.0 | 121.4 | 28.5 | 305.2 | 72.0  | 11446.2 | 844.6  | 266.8 | 140.2 |
| 8                     | 5.1 | 730 | -14.69        | 1.68         | 0.01 | 32.04 | 0.06 | 0.90 | 2.87 | 1.76 | 20.9 | 7.4  | 89.8  | 39.4 | 190.6 | 46.0 | 493.2 | 119.1 | 10474.6 | 1315.8 | 396.1 | 201.1 |
| 9                     | 5.9 | 744 | -14.05        | 1.96         | 0.05 | 29.35 | 0.29 | 3.53 | 6.31 | 2.10 | 32.2 | 10.6 | 117.1 | 47.5 | 222.9 | 50.0 | 504.5 | 115.0 | 10312.9 | 1519.9 | 205.3 | 199.7 |
| 10                    | 6.1 | 748 | -13.92        | 2.01         | 0.02 | 47.82 | 0.08 | 1.53 | 4.41 | 2.40 | 26.3 | 9.2  | 106.6 | 45.4 | 213.4 | 49.9 | 523.6 | 124.5 | 10420.4 | 1512.8 | 496.3 | 345.3 |
| 11                    | 3.5 | 699 | -15.64        | 1.53         | 0.02 | 19.87 | 0.04 | 0.65 | 2.54 | 1.45 | 15.8 | 6.1  | 72.1  | 31.8 | 155.6 | 37.8 | 408.3 | 100.2 | 10715.0 | 1078.6 | 259.5 | 109.4 |
| 12                    | 3.2 | 690 | -15.56        | 1.84         | 0.00 | 22.27 | 0.03 | 0.66 | 2.23 | 1.17 | 14.2 | 5.6  | 69.0  | 31.9 | 161.3 | 40.1 | 439.1 | 108.0 | 10947.8 | 1100.5 | 251.4 | 101.7 |
| 13                    | 3.9 | 707 | -15.02        | 1.93         | 0.00 | 24.68 | 0.06 | 0.97 | 2.28 | 1.43 | 17.0 | 6.5  | 80.0  | 34.1 | 166.7 | 40.3 | 438.8 | 105.1 | 10553.1 | 1156.7 | 228.1 | 96.3  |
| 14                    | 3.5 | 699 | -15.27        | 1.89         | 0.03 | 28.05 | 0.18 | 3.03 | 6.23 | 2.05 | 34.1 | 11.6 | 132.1 | 55.3 | 251.4 | 58.8 | 594.5 | 138.1 | 11031.0 | 1761.6 | 338.1 | 212.4 |
| 15                    | 4.8 | 726 | -14.95        | 1.52         | 0.13 | 21.60 | 0.08 | 1.34 | 2.68 | 1.47 | 16.9 | 6.1  | 71.4  | 30.3 | 150.8 | 37.5 | 412.3 | 102.3 | 10088.8 | 1051.7 | 226.5 | 96.2  |
| 16                    | 8.8 | 783 | -13.74        | 1.38         | 0.09 | 33.47 | 0.11 | 1.33 | 4.17 | 2.13 | 29.1 | 10.6 | 128.4 | 55.2 | 257.7 | 60.7 | 631.5 | 146.8 | 9993.6  | 1808.7 | 351.0 | 151.0 |
| 17                    | 6.1 | 747 | -14.00        | 1.95         | 0.03 | 38.00 | 0.07 | 1.22 | 2.71 | 1.56 | 19.5 | 6.7  | 81.6  | 35.2 | 173.3 | 43.0 | 456.7 | 111.7 | 10478.3 | 1203.8 | 338.1 | 162.1 |
| 18                    | 5.8 | 743 | -14.54        | 1.51         | 0.08 | 26.57 | 0.09 | 1.36 | 2.77 | 1.58 | 20.2 | 7.6  | 92.1  | 39.7 | 191.3 | 47.4 | 498.2 | 118.2 | 10614.7 | 1338.1 | 287.4 | 128.4 |
| 19                    | 2.8 | 677 | -15.38        | 2.35         | 0.02 | 24.32 | 0.05 | 1.14 | 2.70 | 1.20 | 15.2 | 5.4  | 63.7  | 27.7 | 137.0 | 33.0 | 362.1 | 89.4  | 10519.4 | 943.3  | 192.8 | 93.4  |
| 20                    | 4.3 | 715 | -15.43        | 1.32         | 1.89 | 15.55 | 0.64 | 4.32 | 4.47 | 2.01 | 22.1 | 6.3  | 68.1  | 27.7 | 127.4 | 29.8 | 320.6 | 77.5  | 10118.2 | 902.3  | 167.6 | 140.1 |
| 21                    | 6.6 | 754 | -15.34        | 0.44         | 0.01 | 8.75  | 0.14 | 1.31 | 2.59 | 1.34 | 11.5 | 3.5  | 35.3  | 14.3 | 66.1  | 16.6 | 184.7 | 47.2  | 8331.4  | 483.6  | 95.0  | 67.6  |
| 22                    | 4.4 | 717 | -15.19        | 1.52         | 0.00 | 10.73 | 0.10 | 1.37 | 1.91 | 1.14 | 10.1 | 3.0  | 32.2  | 12.9 | 62.2  | 14.8 | 163.5 | 41.2  | 9327.6  | 441.5  | 62.2  | 42.5  |
| 23                    | 7.2 | 763 | -14.11        | 1.48         | 0.17 | 23.12 | 0.14 | 1.77 | 3.12 | 1.53 | 17.6 | 6.3  | 75.8  | 33.6 | 167.0 | 40.3 | 423.2 | 102.5 | 9645.8  | 1141.7 | 184.1 | 129.1 |
| 24                    | 5.4 | 737 | -14.37        | 1.83         | 0.00 | 19.76 | 0.07 | 0.85 | 1.89 | 1.19 | 9.6  | 2.9  | 37.2  | 17.4 | 92.9  | 23.5 | 269.8 | 70.8  | 9578.2  | 613.2  | 117.7 | 53.8  |
| 25                    | 4.8 | 725 | -15.30        | 1.19         | 0.01 | 9.07  | 0.05 | 0.79 | 1.56 | 0.79 | 7.4  | 2.4  | 27.1  | 11.8 | 60.4  | 15.1 | 175.2 | 45.5  | 8831.7  | 415.0  | 58.6  | 29.9  |
| 26                    | 4.7 | 722 | -15.26        | 1.29         | 0.04 | 16.18 | 0.10 | 1.32 | 3.98 | 1.93 | 21.3 | 7.1  | 84.9  | 36.5 | 180.6 | 42.9 | 463.6 | 111.8 | 9061.5  | 1243.4 | 171.1 | 73.8  |

|    |      |     |        |      |      |       |      |      |      |      |      |     |      |      |       |      |       |       |         |        |       |       |
|----|------|-----|--------|------|------|-------|------|------|------|------|------|-----|------|------|-------|------|-------|-------|---------|--------|-------|-------|
| 27 | 8.9  | 784 | -14.87 | 0.23 | 0.01 | 10.19 | 0.12 | 1.24 | 2.48 | 1.31 | 11.2 | 3.5 | 39.1 | 17.1 | 89.9  | 23.6 | 268.4 | 71.6  | 8227.4  | 616.8  | 121.2 | 61.8  |
| 28 | 5.9  | 745 | -15.06 | 0.94 | 0.01 | 19.47 | 0.06 | 1.15 | 2.87 | 1.56 | 17.5 | 6.1 | 77.0 | 33.1 | 162.1 | 38.7 | 413.1 | 98.4  | 10248.2 | 1110.6 | 290.1 | 141.5 |
| 29 | 6.4  | 752 | -14.83 | 0.99 | 0.00 | 19.33 | 0.06 | 1.15 | 3.64 | 2.11 | 24.1 | 8.0 | 93.8 | 40.7 | 196.5 | 46.0 | 486.3 | 114.9 | 9366.0  | 1349.9 | 249.7 | 106.2 |
| 30 | 10.7 | 803 | -12.78 | 1.90 | 0.00 | 43.57 | 0.04 | 0.95 | 2.53 | 0.32 | 15.4 | 6.1 | 76.1 | 33.5 | 163.1 | 38.7 | 392.3 | 86.9  | 12196.7 | 1071.2 | 268.6 | 132.6 |

Table S4: In situ Hf isotopic data of zircon from the Nihe IOA deposit and the Shaxi Cu-Au deposit.

5

| Spot                            | $^{176}\text{Hf}/^{177}\text{Hf}$ | 1 $\sigma$ | $^{176}\text{Lu}/^{177}\text{Hf}$ | 1 $\sigma$ | $^{176}\text{Yb}/^{177}\text{Hf}$ | 1 $\sigma$ | $\varepsilon\text{Hf}(0)$ | 1 $\sigma$ | $\varepsilon\text{Hf}(t)$ | 1 $\sigma$ | T <sub>DM1</sub> | T <sub>DM2</sub> |
|---------------------------------|-----------------------------------|------------|-----------------------------------|------------|-----------------------------------|------------|---------------------------|------------|---------------------------|------------|------------------|------------------|
| <b>Nihe magmatic zircon</b>     |                                   |            |                                   |            |                                   |            |                           |            |                           |            |                  |                  |
| 1                               | 0.282394                          | 0.000020   | 0.001832                          | 0.000011   | 0.079201                          | 0.000528   | -13.37                    | 0.88       | -10.69                    | 0.88       | 1240             | 1643             |
| 2                               | 0.282373                          | 0.000018   | 0.001174                          | 0.000003   | 0.048002                          | 0.000210   | -14.11                    | 0.81       | -11.31                    | 0.82       | 1247             | 1680             |
| 3                               | 0.282392                          | 0.000028   | 0.000832                          | 0.000005   | 0.037288                          | 0.000078   | -13.45                    | 1.12       | -10.66                    | 1.12       | 1210             | 1643             |
| 4                               | 0.282386                          | 0.000021   | 0.001067                          | 0.000006   | 0.045378                          | 0.000567   | -13.63                    | 0.89       | -10.84                    | 0.90       | 1225             | 1654             |
| 5                               | 0.282374                          | 0.000033   | 0.001150                          | 0.000002   | 0.048930                          | 0.000344   | -14.06                    | 1.28       | -11.32                    | 1.29       | 1244             | 1678             |
| 6                               | 0.282377                          | 0.000021   | 0.000986                          | 0.000006   | 0.041313                          | 0.000134   | -13.95                    | 0.89       | -11.15                    | 0.90       | 1235             | 1671             |
| 7                               | 0.282373                          | 0.000013   | 0.001744                          | 0.000011   | 0.075561                          | 0.000554   | -14.11                    | 0.69       | -11.43                    | 0.70       | 1266             | 1684             |
| 8                               | 0.282384                          | 0.000021   | 0.002183                          | 0.000035   | 0.090002                          | 0.002004   | -13.72                    | 0.90       | -11.02                    | 0.91       | 1266             | 1663             |
| 9                               | 0.282366                          | 0.000020   | 0.001781                          | 0.000012   | 0.072186                          | 0.000655   | -14.35                    | 0.86       | -11.64                    | 0.87       | 1277             | 1697             |
| 10                              | 0.282378                          | 0.000011   | 0.000231                          | 0.000007   | 0.011517                          | 0.000249   | -13.95                    | 0.63       | -11.13                    | 0.64       | 1210             | 1668             |
| 11                              | 0.282397                          | 0.000024   | 0.001278                          | 0.000003   | 0.058191                          | 0.000597   | -13.27                    | 1.00       | -10.52                    | 1.01       | 1217             | 1635             |
| 12                              | 0.282370                          | 0.000030   | 0.000880                          | 0.000004   | 0.036349                          | 0.000133   | -14.21                    | 1.18       | -11.42                    | 1.18       | 1241             | 1685             |
| <b>Nihe hydrothermal zircon</b> |                                   |            |                                   |            |                                   |            |                           |            |                           |            |                  |                  |
| 1                               | 0.282394                          | 0.000011   | 0.001304                          | 0.000004   | 0.060810                          | 0.000765   | -13.37                    | 0.65       | -10.62                    | 0.66       | 1222             | 1641             |
| 2                               | 0.282383                          | 0.000011   | 0.000995                          | 0.000001   | 0.042050                          | 0.000270   | -13.75                    | 0.64       | -10.96                    | 0.65       | 1227             | 1660             |
| 3                               | 0.282401                          | 0.000012   | 0.001806                          | 0.000002   | 0.082814                          | 0.000704   | -13.11                    | 0.67       | -10.40                    | 0.68       | 1228             | 1629             |
| 4                               | 0.282404                          | 0.000016   | 0.001558                          | 0.000020   | 0.067678                          | 0.000381   | -13.01                    | 0.75       | -10.28                    | 0.76       | 1216             | 1622             |
| 5                               | 0.282409                          | 0.000019   | 0.002344                          | 0.000017   | 0.116686                          | 0.001800   | -12.84                    | 0.84       | -10.19                    | 0.84       | 1235             | 1616             |
| 6                               | 0.282383                          | 0.000015   | 0.002188                          | 0.000005   | 0.098397                          | 0.000913   | -13.77                    | 0.73       | -11.11                    | 0.73       | 1268             | 1667             |
| 7                               | 0.282426                          | 0.000018   | 0.002006                          | 0.000004   | 0.097315                          | 0.000601   | -12.22                    | 0.83       | -9.52                     | 0.83       | 1198             | 1580             |
| 8                               | 0.282377                          | 0.000018   | 0.001777                          | 0.000044   | 0.084656                          | 0.003177   | -13.98                    | 0.81       | -11.28                    | 0.82       | 1262             | 1677             |
| 9                               | 0.282415                          | 0.000017   | 0.002051                          | 0.000014   | 0.089676                          | 0.000779   | -12.63                    | 0.80       | -9.96                     | 0.80       | 1217             | 1603             |
| 10                              | 0.282407                          | 0.000019   | 0.002827                          | 0.000006   | 0.125436                          | 0.000580   | -12.92                    | 0.86       | -10.31                    | 0.86       | 1255             | 1623             |
| <b>Shaxi magma zircon</b>       |                                   |            |                                   |            |                                   |            |                           |            |                           |            |                  |                  |
| 1                               | 0.282612                          | 0.000015   | 0.001430                          | 0.000014   | 0.051632                          | 0.000693   | -5.65                     | 0.74       | -2.92                     | 0.75       | 916              | 1214             |
| 2                               | 0.282612                          | 0.000016   | 0.001656                          | 0.000015   | 0.062775                          | 0.000995   | -5.64                     | 0.76       | -2.93                     | 0.77       | 921              | 1215             |
| 3                               | 0.282636                          | 0.000016   | 0.001518                          | 0.000007   | 0.053192                          | 0.000443   | -4.81                     | 0.76       | -2.09                     | 0.77       | 885              | 1168             |
| 4                               | 0.282633                          | 0.000016   | 0.001688                          | 0.000029   | 0.062212                          | 0.001440   | -4.91                     | 0.76       | -2.21                     | 0.77       | 893              | 1174             |
| 5                               | 0.282628                          | 0.000018   | 0.001513                          | 0.000006   | 0.051863                          | 0.000590   | -5.08                     | 0.80       | -2.36                     | 0.81       | 895              | 1183             |
| 6                               | 0.282639                          | 0.000015   | 0.001696                          | 0.000019   | 0.062283                          | 0.001008   | -4.72                     | 0.74       | -2.01                     | 0.75       | 885              | 1163             |
| 7                               | 0.282608                          | 0.000015   | 0.001447                          | 0.000017   | 0.056773                          | 0.000767   | -5.81                     | 0.74       | -3.08                     | 0.75       | 923              | 1223             |
| 8                               | 0.282604                          | 0.000019   | 0.001353                          | 0.000008   | 0.048799                          | 0.000838   | -5.93                     | 0.85       | -3.20                     | 0.86       | 926              | 1229             |
| 9                               | 0.282598                          | 0.000018   | 0.001445                          | 0.000015   | 0.056014                          | 0.001069   | -6.15                     | 0.82       | -3.43                     | 0.83       | 937              | 1242             |
| 10                              | 0.282608                          | 0.000016   | 0.001729                          | 0.000014   | 0.067572                          | 0.000920   | -5.81                     | 0.75       | -3.10                     | 0.76       | 930              | 1224             |
| 11                              | 0.282646                          | 0.000015   | 0.001483                          | 0.000015   | 0.057345                          | 0.000680   | -4.45                     | 0.74       | -1.73                     | 0.74       | 869              | 1148             |
| 12                              | 0.282636                          | 0.000014   | 0.001390                          | 0.000012   | 0.052295                          | 0.000813   | -4.82                     | 0.71       | -2.09                     | 0.72       | 882              | 1168             |

---

|           |          |          |          |          |          |          |       |      |       |      |     |      |
|-----------|----------|----------|----------|----------|----------|----------|-------|------|-------|------|-----|------|
| <b>13</b> | 0.282634 | 0.000015 | 0.002093 | 0.000035 | 0.080768 | 0.001858 | -4.88 | 0.73 | -2.21 | 0.74 | 901 | 1174 |
| <b>14</b> | 0.282605 | 0.000021 | 0.001452 | 0.000038 | 0.051584 | 0.001512 | -5.90 | 0.90 | -3.17 | 0.91 | 927 | 1228 |
| <b>15</b> | 0.282607 | 0.000015 | 0.001361 | 0.000009 | 0.048996 | 0.000449 | -5.85 | 0.73 | -3.11 | 0.74 | 922 | 1225 |
| <b>16</b> | 0.282631 | 0.000022 | 0.001763 | 0.000014 | 0.065295 | 0.000967 | -4.97 | 0.93 | -2.27 | 0.94 | 897 | 1178 |
| <b>17</b> | 0.282594 | 0.000016 | 0.001436 | 0.000013 | 0.053185 | 0.000798 | -6.29 | 0.77 | -3.56 | 0.78 | 942 | 1249 |
| <b>18</b> | 0.282622 | 0.000017 | 0.001861 | 0.000029 | 0.073585 | 0.001618 | -5.32 | 0.78 | -2.63 | 0.79 | 913 | 1198 |
| <b>19</b> | 0.282618 | 0.000021 | 0.001939 | 0.000030 | 0.071968 | 0.000783 | -5.43 | 0.89 | -2.75 | 0.90 | 920 | 1204 |
| <b>20</b> | 0.282668 | 0.000019 | 0.002505 | 0.000040 | 0.091448 | 0.000804 | -3.67 | 0.84 | -1.04 | 0.85 | 861 | 1109 |

---
